# Supplementary material for: Larval Migration Behaviour of Busseola fusca (Lepidoptera: Noctuidae) on Bt and Non-Bt Maize under Semi-Field and Field Conditions
Source: MDPI journal article supplement (doi:10.3390/insects11010016), 2019-12-23
Supplement: s1 [file s1]

**Table S1.** Factorial analyses of variance of the number of damaged maize plants in glasshouse treatment plots, the general linear model analysis of the percentage of plants damaged, and the general linear model analysis of the damage rating score of maize plants at various distance intervals from the point of inoculation (Figure 1). Results provided are limited to the main factors and interactions that had a significant p-value.

|                        | Source                          | SS      | d.f. | MS      | F-value | p-value |
|------------------------|---------------------------------|---------|------|---------|---------|---------|
| Early infestation      | Number of damaged maize plants  |         |      |         |         |         |
|                        | Week                            | 29.58   | 4    | 7.40    | 8.51    | ***     |
|                        | Row                             | 185.01  | 1    | 185.01  | 212.79  | ***     |
|                        | Week * Row                      | 10.78   | 4    | 2.70    | 3.10    | *       |
|                        | Error                           | 78.25   | 90   | 0.87    |         |         |
|                        | Percentage damaged maize plants |         |      |         |         |         |
|                        | Distance                        | 16.88   | 2    | 8.44    | 108.77  | ***     |
|                        | Row * Distance                  | 11.81   | 2    | 5.90    | 76.08   | ***     |
|                        | Error                           | 23.20   | 299  | 0.08    |         |         |
| Late infestation       | Number of damaged maize plants  |         |      |         |         |         |
|                        | Hybrid                          | 3.36    | 2    | 1.68    | 5.50    | **      |
|                        | Row                             | 40.50   | 1    | 40.50   | 132.55  | ***     |
|                        | Hybrid * Row                    | 2.58    | 2    | 1.29    | 4.23    | *       |
|                        | Error                           | 16.50   | 54   | 0.31    |         |         |
|                        | Percentage damaged maize plants |         |      |         |         |         |
|                        | Distance                        | 10.51   | 2    | 5.25    | 106.16  | ***     |
|                        | Row * Distance                  | 10.63   | 2    | 5.31    | 107.38  | ***     |
|                        | Error                           | 8.86    | 179  | 0.05    |         |         |
| Early infestation date | Damage rating score             |         |      |         |         |         |
|                        | Week                            | 89.19   | 4    | 22.30   | 12.62   | ***     |
|                        | Hybrid                          | 81.49   | 2    | 40.75   | 23.07   | ***     |
|                        | Row                             | 1077.56 | 1    | 1077.56 | 610.06  | ***     |
|                        | Distance                        | 922.21  | 2    | 461.11  | 261.05  | ***     |
|                        | Week * Row                      | 25.68   | 4    | 6.42    | 3.64    | **      |
|                        | Hybrid * Distance               | 56.89   | 4    | 14.22   | 8.05    | ***     |
|                        | Row * Distance                  | 1025.97 | 2    | 512.98  | 290.42  | ***     |
|                        | Hybrid * Row * Distance         | 18.22   | 4    | 4.55    | 2.58    | *       |
|                        | Error                           | 476.91  | 270  | 1.77    |         |         |
| Late infestation date  | Week                            | 33.31   | 2    | 16.65   | 32.26   | ***     |
|                        | Row                             | 152.79  | 1    | 152.79  | 295.99  | ***     |
|                        | Distance                        | 187.20  | 2    | 93.60   | 181.32  | ***     |
|                        | Week * Row                      | 29.21   | 2    | 14.60   | 28.29   | ***     |
|                        | Week * Distance                 | 35.50   | 4    | 8.88    | 17.20   | ***     |
|                        | Hybrid * Distance               | 9.07    | 4    | 2.27    | 4.39    | **      |
|                        | Row * Distance                  | 194.36  | 2    | 97.18   | 188.26  | ***     |
|                        | Week * Row * Distance           | 37.31   | 4    | 9.33    | 18.07   | ***     |
|                        | Error                           | 83.63   | 162  | 0.52    |         |         |

---

Significance indicated by \* ( $p < 0.05$ ), \*\* ( $p < 0.01$ ), and \*\*\* ( $p < 0.001$ ).

6

7

**Table S2.** The general linear model analysis of the number of surviving larvae in maize plants at various distance intervals from the point of inoculation (Figure 1) in glasshouse treatment plots. Results included were limited to the main factors and interactions that had a significant p-value.

| Source                            | SS     | d.f. | MS    | F-value | p-value |
|-----------------------------------|--------|------|-------|---------|---------|
| Row                               | 65.34  | 1    | 65.34 | 25.73   | ***     |
| Distance                          | 80.10  | 2    | 40.05 | 15.77   | ***     |
| Infestation date * Distance       | 24.35  | 2    | 12.17 | 4.79    | **      |
| Row * Distance                    | 68.18  | 2    | 34.09 | 13.43   | ***     |
| Infestation date * Row * Distance | 32.38  | 2    | 16.19 | 6.38    | **      |
| Error                             | 274.25 | 108  | 2.54  |         |         |

Significance indicated by \* (p<0.05), \*\* (p<0.01), and \*\*\*(p<0.001).

**Table S3.** Factorial analyses of variance of the number of damaged maize plants in field treatment plots, the general linear model analysis of the percentage of plants damaged, and the general linear model analysis of the damage rating score of maize plants at various distance intervals from the point of inoculation (Figure 1). Results included were limited to the main factors and interactions that had a significant p-value.

| Source                             | SS     | d.f. | MS     | F-value | p-value |
|------------------------------------|--------|------|--------|---------|---------|
| Number of damaged maize plants     |        |      |        |         |         |
| Plant density                      | 22.04  | 1    | 22.04  | 10.24   | **      |
| Week                               | 22.27  | 2    | 11.14  | 5.17    | **      |
| Hybrid                             | 28.17  | 1    | 28.17  | 13.08   | ***     |
| Row                                | 108.38 | 1    | 108.38 | 50.34   | ***     |
| Error                              | 155.00 | 72   | 2.15   |         |         |
| Percentage of damaged maize plants |        |      |        |         |         |
| Distance                           | 11.67  | 2    | 5.83   | 74.43   | ***     |
| Row * Distance                     | 8.42   | 2    | 4.21   | 53.77   | ***     |
| Error                              | 19.83  | 253  | 0.08   |         |         |
| Damage rating score                |        |      |        |         |         |
| Plant density                      | 25.39  | 1    | 25.39  | 11.72   | ***     |
| Week                               | 265.57 | 2    | 132.79 | 61.28   | ***     |
| Hybrid                             | 43.54  | 1    | 43.54  | 20.09   | ***     |
| Row                                | 598.05 | 1    | 598.05 | 275.99  | ***     |
| Distance                           | 432.67 | 2    | 216.34 | 99.83   | ***     |
| Plant density * Row                | 11.35  | 1    | 11.35  | 5.24    | *       |
| Week * Row                         | 84.98  | 2    | 42.49  | 19.61   | ***     |
| Week * Distance                    | 64.82  | 4    | 16.21  | 7.48    | ***     |
| Hybrid * Distance                  | 20.11  | 2    | 10.05  | 4.64    | **      |
| Row * Distance                     | 521.91 | 2    | 260.95 | 120.42  | ***     |
| Week * Row * Distance              | 53.41  | 4    | 13.35  | 6.16    | ***     |
| Error                              | 468.06 | 216  | 2.17   |         |         |

Significance indicated by \* (p<0.05), \*\* (p<0.01), and \*\*\*(p<0.001).

**Table S4.** The general linear model analysis of the number of surviving larvae recovered from maize plants in the inoculated and adjacent rows at various distance intervals from the point of inoculation (Figure 1) in field trial treatment plots. Results included were limited to the main factors and interactions that had a significant p-value.

| Source         | SS    | d.f. | MS    | F-value | p-value |
|----------------|-------|------|-------|---------|---------|
| Row            | 35.04 | 1    | 35.04 | 14.09   | ***     |
| Distance       | 20.59 | 2    | 10.29 | 4.14    | *       |
| Row * Distance | 17.58 | 2    | 8.79  | 3.54    | *       |
| Error          | 179   | 72   | 2.49  |         |         |

Significance indicated by \* ( $p < 0.05$ ), \*\* ( $p < 0.01$ ), and \*\*\* ( $p < 0.001$ ).
